# Supplementary material for: Cellulose Nanofiber–Alginate Biotemplated Cobalt Composite Multifunctional Aerogels for Energy Storage Electrodes
Source: MDPI journal article supplement (doi:10.3390/gels9110893), 2023-11-11
Supplement: s1 [file s1]

# Supporting Information

## Cellulose Nanofiber-Alginate Biotemplated Cobalt Composite Multifunctional Aerogels for Energy Storage

Felita W. Zhang <sup>1</sup>, Paul D. Trackey <sup>1</sup>, Vani Verma <sup>1</sup>, Galen T. Mandes <sup>1</sup>, Rosemary L. Calabro <sup>1,2</sup>, Anthony W. Presot <sup>1</sup>, Claire K. Tsay <sup>1</sup>, Timothy J. Lawton <sup>3</sup>, Alexa S. Zammit <sup>1</sup>, Edward M. Tang <sup>1</sup>, Andrew Q. Nguyen <sup>1</sup>, Kennedy V. Munz <sup>1</sup>, Enoch A. Nagelli <sup>1,4</sup>, Stephen F. Bartolucci <sup>2</sup>, Joshua A. Maurer <sup>2</sup> and F. John Burpo <sup>1,4,\*</sup>

<sup>1</sup> Department of Chemistry and Life Science, United States Military Academy, West Point, NY 10996, USA; felita.zhang@westpoint.edu (F.W.Z.); paul.trackey@westpoint.edu (P.D.T.); vani.verma.mil@army.mil (V.V.); galen.mandes@westpoint.edu (G.T.M.); rosemary.calabro@westpoint.edu (R.L.C.); anthony.presot@westpoint.edu (A.W.P.); claire.tsay@westpoint.edu (C.K.T.); alexa.zammit@westpoint.edu (A.S.Z.); edward.tang@westpoint.edu (E.M.T.); andrew.nguyen@westpoint.edu (A.Q.N.); kennedy.munz@westpoint.edu (K.V.M.); enoch.nagelli@westpoint.edu (E.A.N.)

<sup>2</sup> U.S. Army Combat Capabilities Development Command-Armaments Center, Watervliet Arsenal, NY 12189, USA; stephen.f.bartolucci.civ@army.mil (S.F.B.); joshua.a.maurer4.civ@army.mil (J.A.M.)

<sup>3</sup> U.S. Army Combat Capabilities Development Command-Soldier Center, Natick, MA 01760, USA; timothy.j.lawton4.civ@army.mil

<sup>4</sup> Photonics Research Center, United States Military Academy, West Point, NY 10996, USA

\* Correspondence: john.burpo@westpoint.edu; Tel.: +1-845-938-3900

| <b><u>Figures</u></b>                                                  | <b><u>Page</u></b> |
|------------------------------------------------------------------------|--------------------|
| <b>S1. SEM (high resolution spherical aggregates; ImageJ analysis)</b> | <b>2</b>           |
| <b>S2. SEM (thermal treatment)</b>                                     | <b>3</b>           |
| <b>S3. ICP chart</b>                                                   | <b>4</b>           |
| <b>Table 1. Percent cobalt and calcium as determined from ICP-OES</b>  | <b>5</b>           |
| <b>S4. XPS survey scan</b>                                             | <b>6</b>           |
| <b>S5. Representative stress-strain curves at low strain ranges</b>    | <b>7</b>           |
| <b>S6. EIS/CV – individual samples (from Figure 10)</b>                | <b>8</b>           |
| <b>S7. Cyclic voltammetry of individual samples</b>                    | <b>9</b>           |

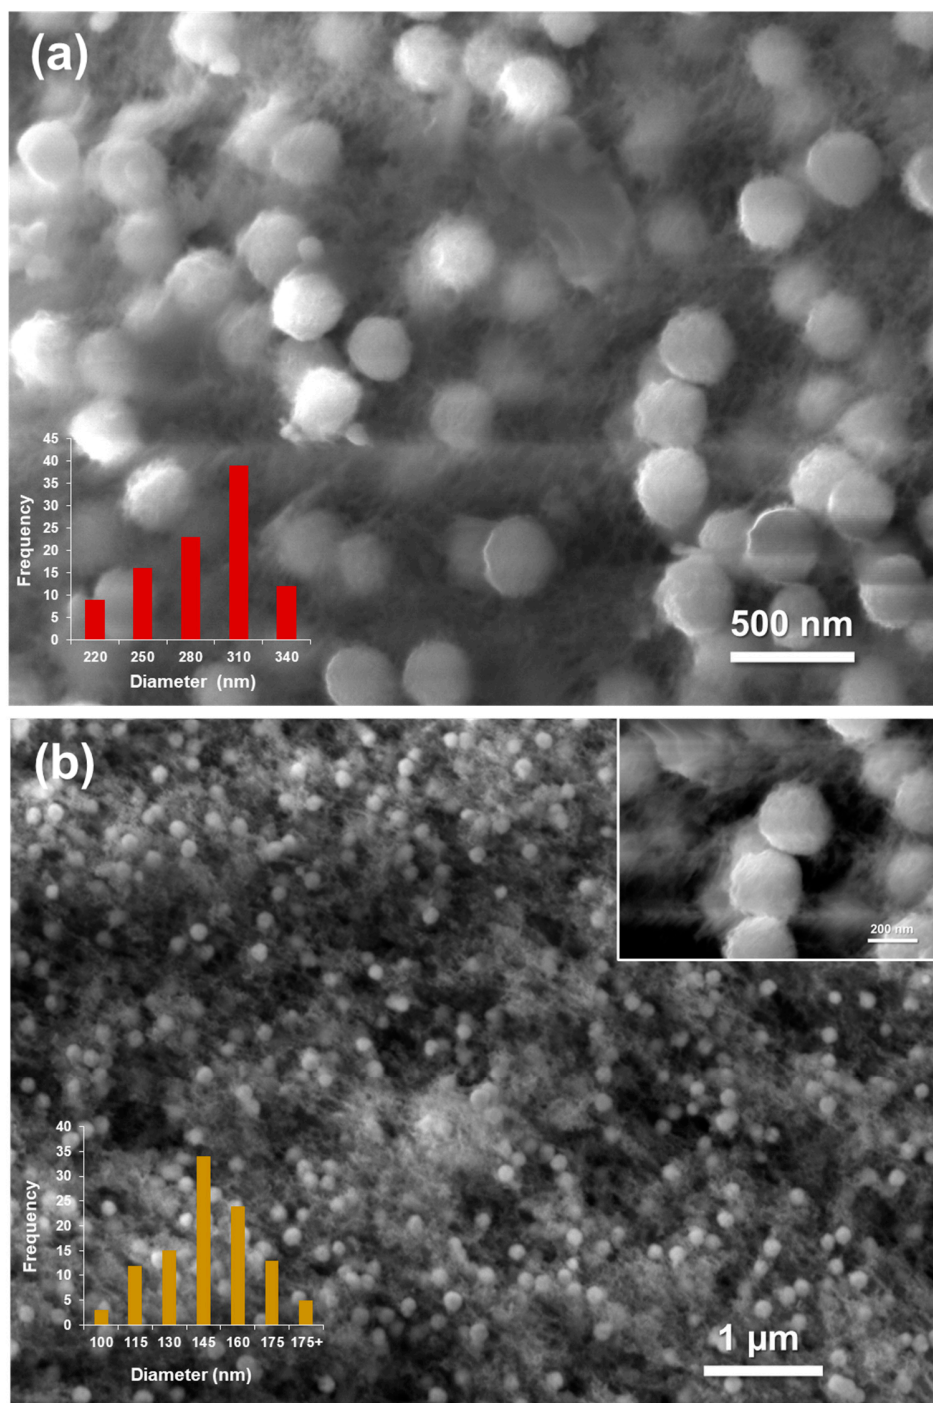

**Figure S1.** Scanning electron micrograph of (a) supercritically dried and (b) pyrolyzed aerogels focused on spherical aggregates with diameter distribution (inset). The average aggregate diameter is (a)  $267 \pm 53$  nm and (b)  $140 \pm 22$  nm.

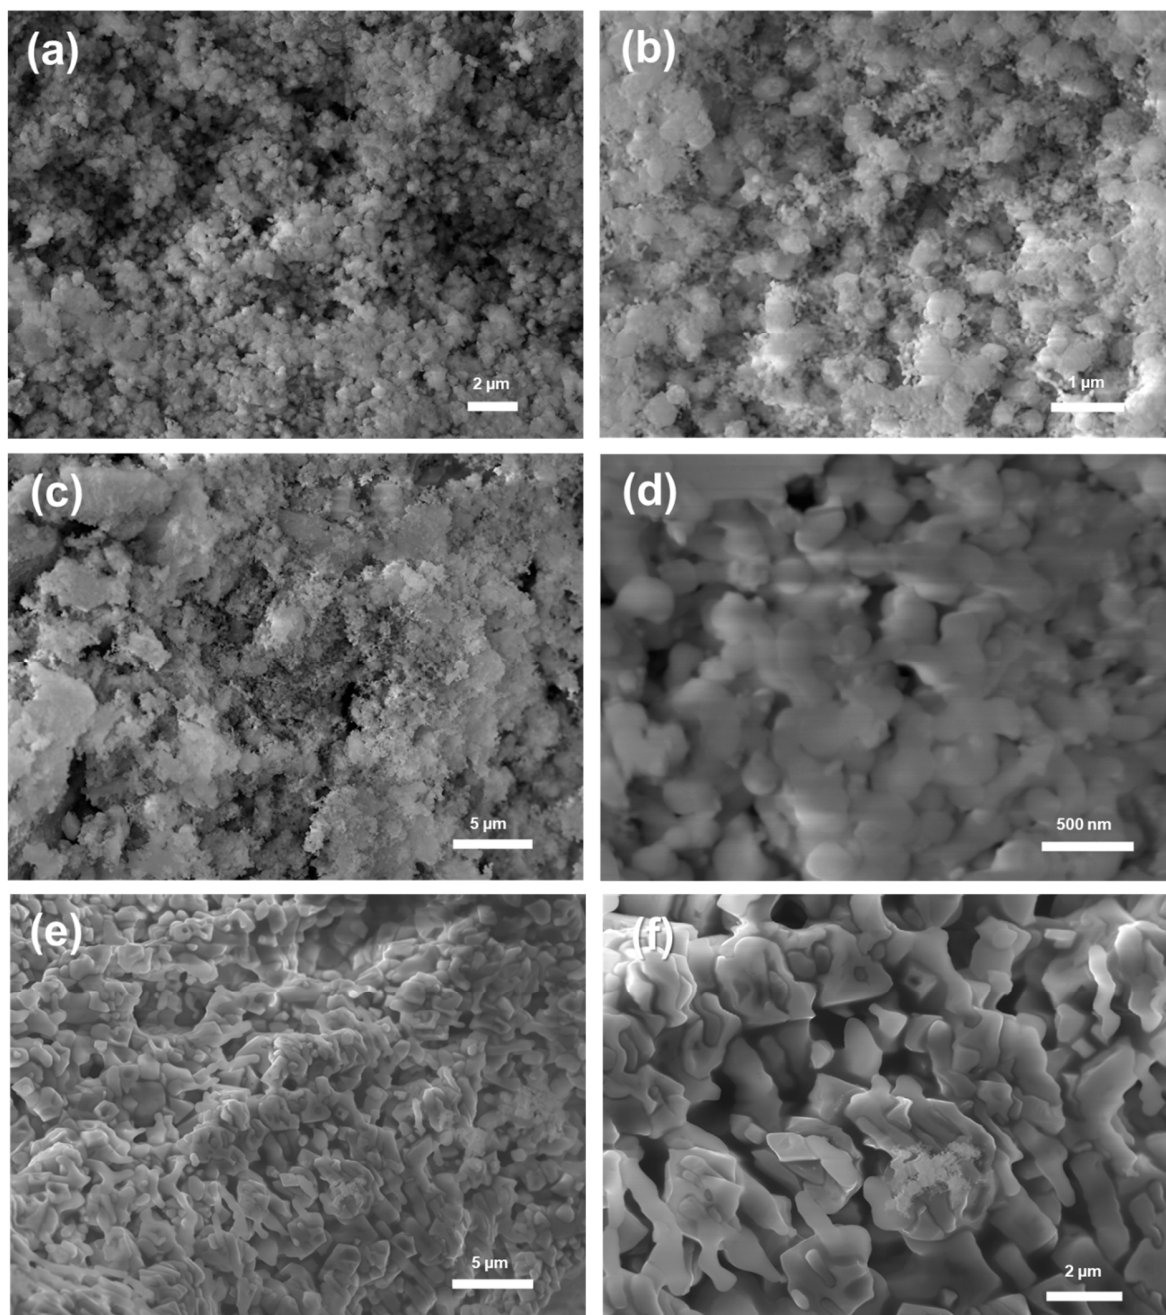

**Figure S2.** Scanning electron micrographs (SEM) of pyrolyzed aerogels thermally oxidized in air for (a)-(b) 550 °C for 1 h, (c)-(d) 600 °C for 30 min, and (e)-(f) 700 °C for 30 min.

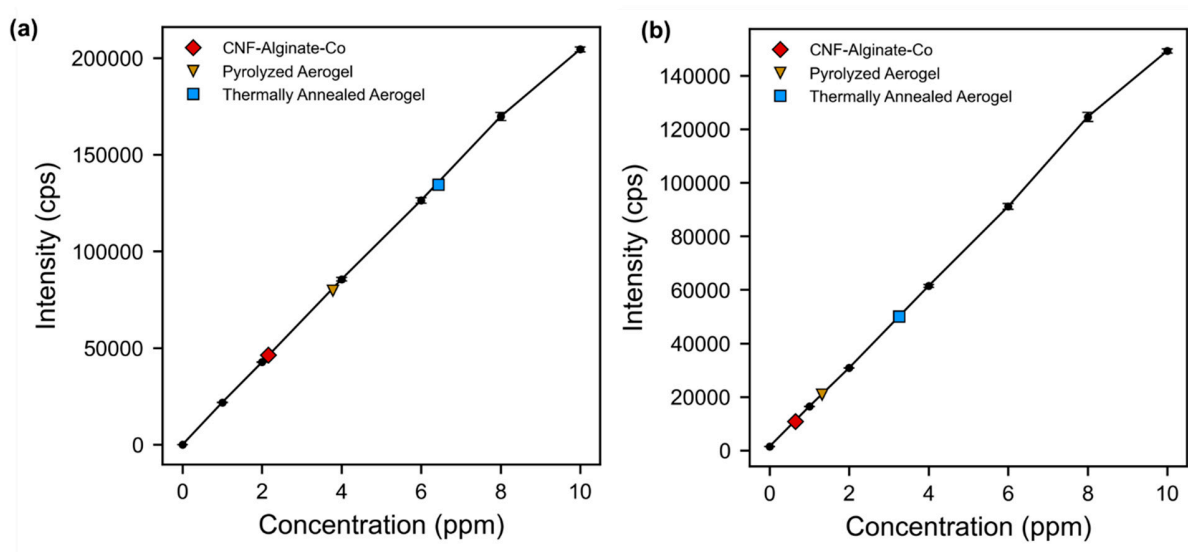

**Figure S3.** Inductively coupled plasma optical emission spectroscopy (ICP-OES) measurements for the cobalt (a) and calcium content (b) of the CNF-Alginate-Co samples at their various processing steps. The calibration curves (black dots) were measured using the SCP Science quality control standard number 4. The CNF-Alginate-Co (red diamonds), pyrolyzed aerogel (yellow triangles) and thermally annealed aerogel (blue squares) were digested in concentrated nitric acid and then diluted prior to analysis.

**Table S1.** Percent cobalt and calcium as determined from ICP-OES measurements.

| Sample<br>Conditions | Initial<br>Mass (mg) | Digestion         | Dilution          | Co Conc<br>(mg / L) | Ca Conc<br>(mg / L) | % Co  | % Ca  |
|----------------------|----------------------|-------------------|-------------------|---------------------|---------------------|-------|-------|
|                      |                      | Conc.<br>(mg / L) | Conc.<br>(mg / L) |                     |                     |       |       |
| CNF-Alginate-Co      | 4.29                 | 171.6             | 13.73             | 2.17                | 0.66                | 15.77 | 4.78  |
| Pyrolyzed            | 3.84                 | 153.6             | 12.29             | 3.79                | 1.32                | 30.81 | 10.76 |
| Thermally Annealed   | 6.67                 | 266.8             | 21.34             | 6.44                | 3.26                | 30.17 | 15.26 |

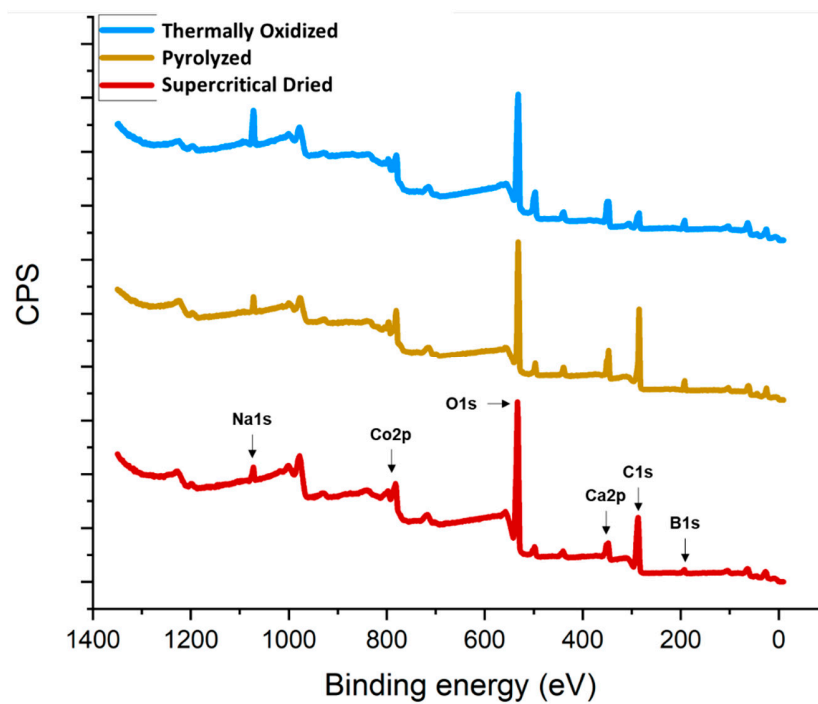

**Figure S4.** X-ray photoelectron spectra (XPS). Survey spectra for supercritically dried, pyrolyzed and thermally oxidized samples.

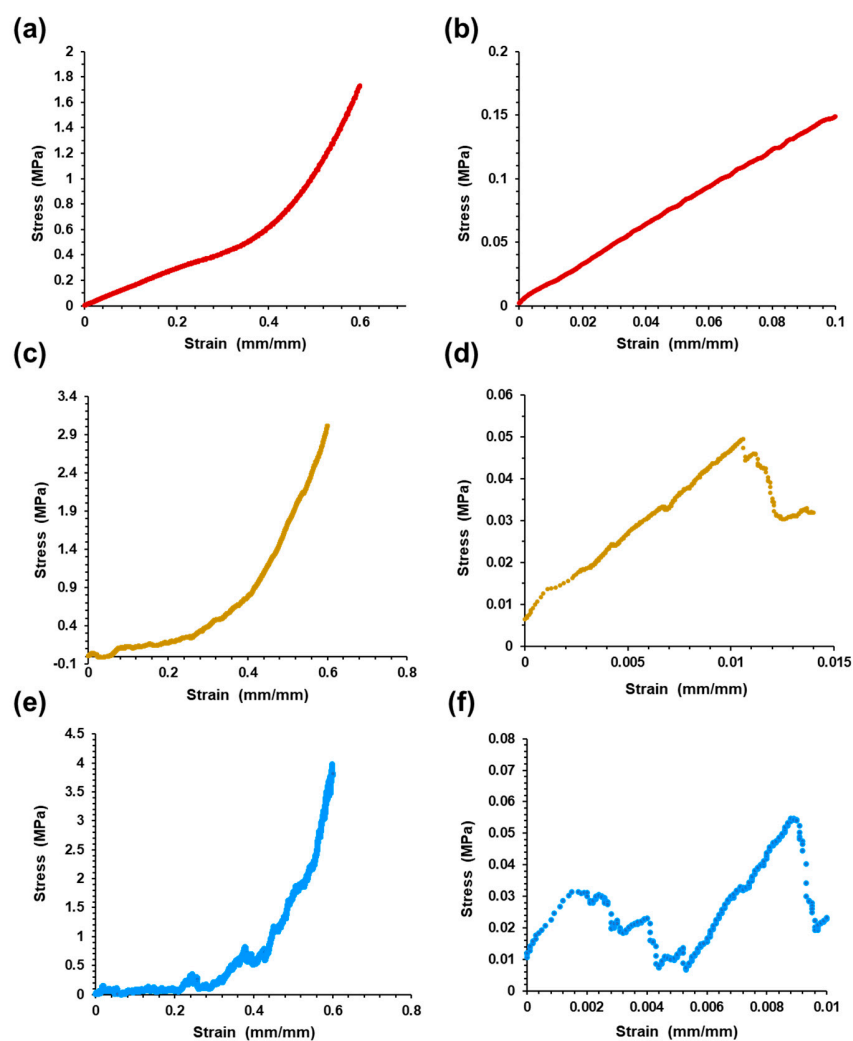

**Figure S5.** Representative aerogel compressive stress-strain curves and low strain range for (a)-(b) supercritically dried, (c)-(d) pyrolyzed, and (e)-(f) thermally oxidized aerogels.

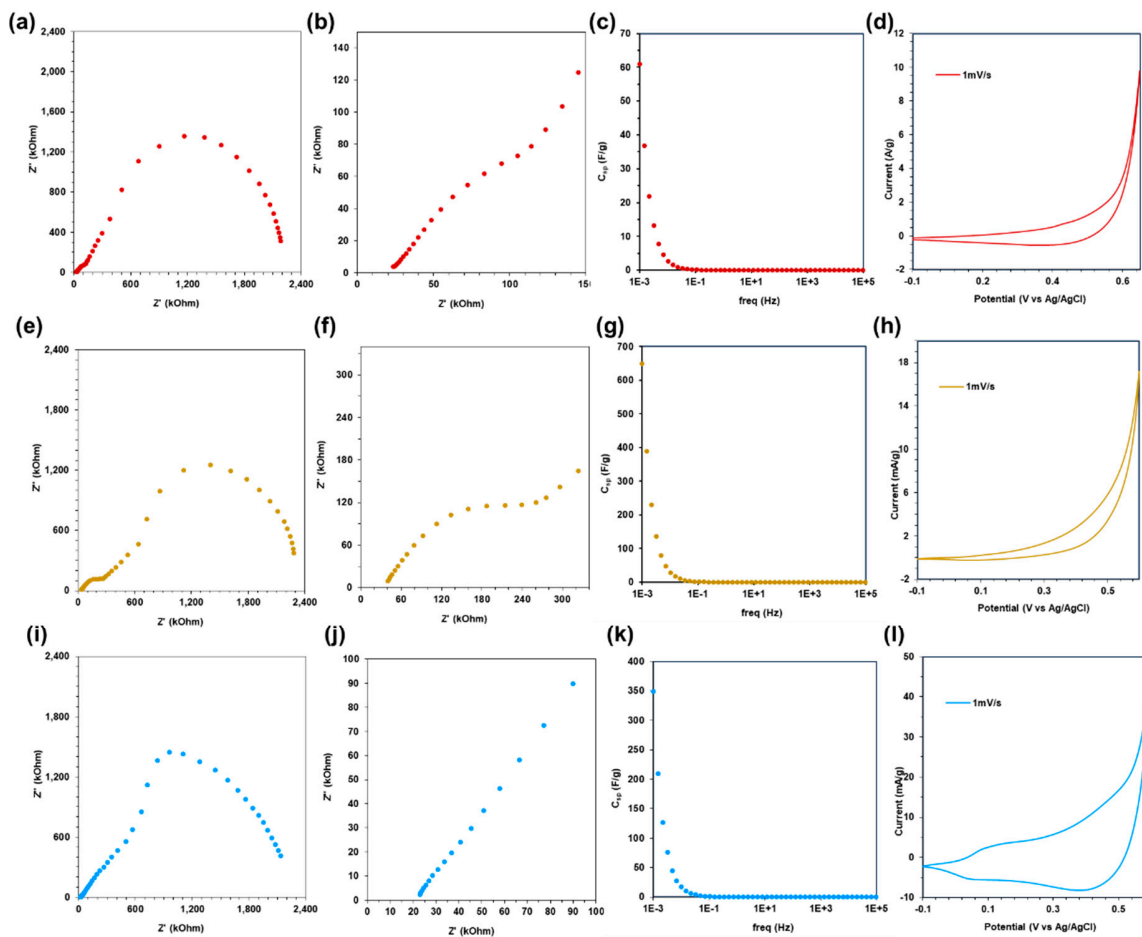

**Figure S6.** Electrochemical characterization in 1 M KOH. Electrochemical impedance spectroscopy (EIS) from 100 kHz to 1 mHz; high frequency impedance; specific capacitance ( $C_{sp}$ ) vs frequency; and cyclic voltammetry at scan rate of 1 mV/s for (a)-(d) supercritically dried, (e)-(h) pyrolyzed, and (i)-(l) thermally oxidized aerogels.



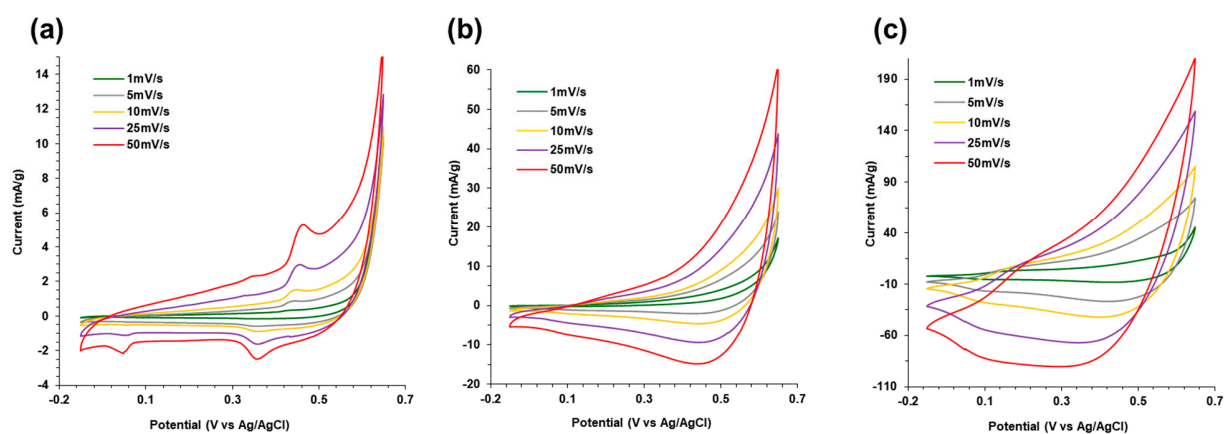

**Figure S7.** Cyclic voltammetry (CV) in 1 M KOH at scan rates of 50, 25, 10, 5, and 1 mV/s for **(a)** supercritically dried, **(b)** pyrolyzed, and **(c)** thermally oxidized aerogels.
